# Supplementary material for: Molecular Cloning and Functional Analysis of GmLACS2-3 Reveals Its Involvement in Cutin and Suberin Biosynthesis along with Abiotic Stress Tolerance
Source: MDPI journal article supplement (doi:10.3390/ijms22179175), 2021-08-25
Supplement: s1 [file s1]

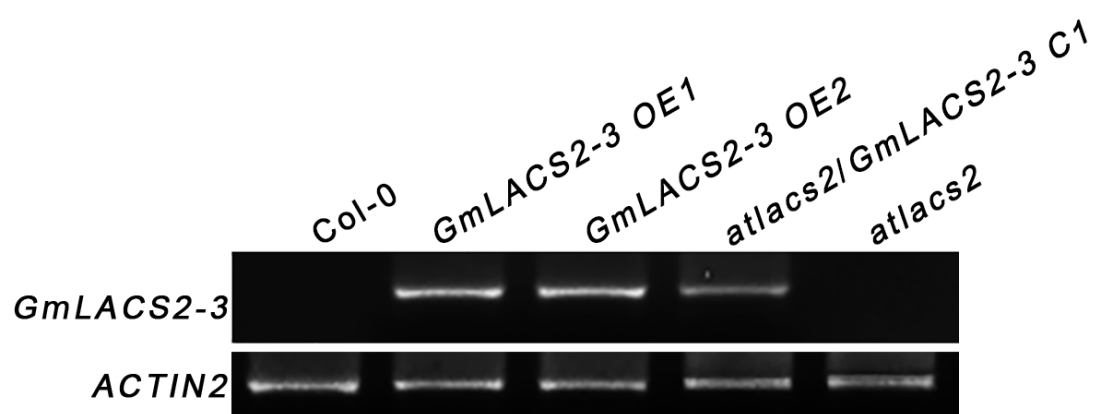

**Figure S1.** Expression of various transcripts of *GmLACS2-3* in Col-0, *GmLACS2-3* OE1, *GmLACS2-3* OE2 and *atlacs2*/GmLACS2-3 C1 and *atlacs2*.

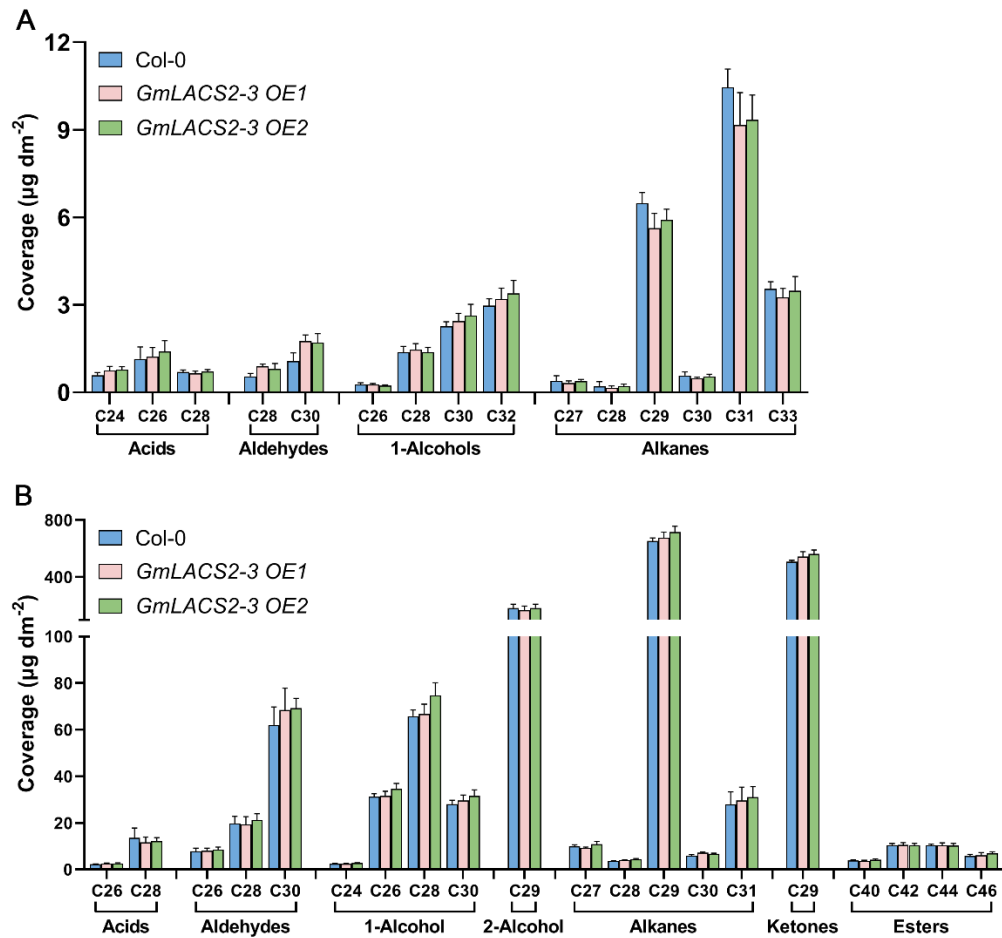

**Figure S2.** Wax composition of leaf and stem of *Arabidopsis* wild-type Col-0, *GmLACS2-3 OE1* and *GmLACS2-3 OE2*. (A) Wax profile in leaves of Col-0, *GmLACS2-3 OE1* and *GmLACS2-3 OE2*. (B) Wax profile in stems of Col-0, *GmLACS2-3 OE1* and *GmLACS2-3 OE2*. Wax coverage is expressed as wax amounts per leaf/stem surface area ( $\text{mg.dm}^{-2}$ ). Each wax constituent is designated by carbon chain length and is labeled by chemical class along the x axis. Values shown are means  $\pm$  SD ( $n=4$ ).

**Table S1.** List of Primers used in this study.

| Name                 | Sequence                                       | Purpose                                             |
|----------------------|------------------------------------------------|-----------------------------------------------------|
| <b>GABI368C02-LP</b> | GAGGCTGTGAAGAAATATCCG                          | For genotyping lacs2-3 T-DNA insertion lines        |
| <b>GABI368C02-RP</b> | GTACTCGAGACTTCCCCGAAG                          | For genotyping lacs2-3 T-DNA insertion lines        |
| <b>o8409</b>         | ATATTGACCATCATACTCATTGC                        | T-DNA left-border primer                            |
| <b>LACS2.3-F</b>     | ACAATTACATTTACAATTACGATG<br>CCAGAGGTTTATACTGT  | Amplification of <i>GmLACS2-3</i> (G.max 20G007900) |
| <b>LACS2.3-R</b>     | AGCTCCTCGCCCTTGCCCATGAAT<br>TGTGCTCTTTTGCCCAAT | Amplification of <i>GmLACS2-3</i> (G.max 20G007900) |
| <b>ACTIN-F</b>       | CGGTGGTTCTATCTTGGCAT                           | Amplification of <i>GmACTIN</i>                     |
| <b>ACTIN-R</b>       | GTCTTTCGCTTCAATAACCCCT                         | Amplification of <i>GmACTIN</i>                     |
| <b>QRT-F1</b>        | GTTTCGCCTGTTGTTCCACTT                          | qRT-PCR, <i>GmLACS2-1</i> (G.max 12G047400)         |
| <b>QRT-R1</b>        | GCCATTCTCCAATGTCACCT                           | qRT-PCR, <i>GmLACS2-1</i> (G.max 12G047400)         |
| <b>QRT-F2</b>        | TGCTTCTCGTGGGAAGAGTT                           | qRT-PCR, <i>GmLACS2-2</i> (G.max 11G122500)         |
| <b>QRT-R2</b>        | GTTTCGCCTGTTGTTCCACTT                          | qRT-PCR, <i>GmLACS2-2</i> (G.max 11G122500)         |
| <b>QRT-F3</b>        | GGCTTTCATGGCTGAAGTGT                           | qRT-PCR, <i>GmLACS2-3</i> (G.max 20G007900)         |
| <b>QRT-R3</b>        | CCTATTGATGAGCCCTTGGA                           | qRT-PCR, <i>GmLACS2-3</i> (G.max 20G007900)         |
| <b>QRT-F4</b>        | TTGGATGAGCTCAACAGCAC                           | qRT-PCR, <i>GmLACS2-4</i> (G.max 07G161900)         |
| <b>QRT-R4</b>        | CAAAGGGAATTGGTTCCAGA                           | qRT-PCR, <i>GmLACS2-4</i> (G.max 07G161900)         |
| <b>RT-F</b>          | CTAGGTGGACGTGTTTCGCAT                          | RT-PCR, <i>GmLACS2-3</i> (G.max 20G007900)          |
| <b>RT-R</b>          | ACCACAACAGCCACCAAGAA                           | RT-PCR, <i>GmLACS2-3</i> (G.max 20G007900)          |
| <b>ACTIN2-F</b>      | GTTGGTGATGAAGCACAAATCCAAG                      | RT-PCR (AT3G18780)                                  |
| <b>ACTIN2-R</b>      | CTGGAACAAGACTTCTGGGCATCT                       | RT-PCR (AT3G18780)                                  |

**Table S2.** The sequences characteristics of identified *LACSs* genes in *Glycine max*.

| S. No | Gene Id*        | Molecular weight | Theoretical <i>pI</i> | AA length | Grand average of hydropathicity (GRAVY) |
|-------|-----------------|------------------|-----------------------|-----------|-----------------------------------------|
| 1.    | G_max_01G225200 | 75365.95         | 6.88                  | 671       | -0.164                                  |
| 2.    | G_max_02G010300 | 74382.04         | 6.54                  | 660       | -0.215                                  |
| 3.    | G_max_03G221400 | 74409.94         | 6.78                  | 662       | -0.194                                  |
| 4.    | G_max_05G216600 | 74670.93         | 6.10                  | 665       | -0.204                                  |
| 5.    | G_max_06G112900 | 76017.50         | 8.24                  | 694       | -0.066                                  |
| 6.    | G_max_07G161900 | 73852.74         | 6.20                  | 660       | -0.197                                  |
| 7.    | G_max_10G010800 | 74516.20         | 6.73                  | 660       | -0.220                                  |
| 8.    | G_max_10G249700 | 76880.03         | 7.86                  | 696       | -0.124                                  |
| 9.    | G_max_11G017900 | 74031.44         | 7.76                  | 663       | -0.153                                  |
| 10.   | G_max_11G122500 | 73788.63         | 6.23                  | 656       | -0.223                                  |
| 11.   | G_max_12G047400 | 73843.48         | 5.58                  | 656       | -0.229                                  |
| 12.   | G_max_13G010100 | 79550.53         | 7.83                  | 725       | -0.107                                  |
| 13.   | G_max_13G079900 | 76131.58         | 5.91                  | 696       | -0.021                                  |
| 14.   | G_max_14G149700 | 70974.48         | 5.90                  | 647       | 0.016                                   |
| 15.   | G_max_15G220900 | 69692.28         | 5.55                  | 625       | -0.034                                  |
| 16.   | G_max_19G218300 | 74643.20         | 6.50                  | 662       | -0.231                                  |
| 17.   | G_max_20G007900 | 73831.71         | 6.39                  | 660       | -0.208                                  |
| 18.   | G_max_20G060300 | 74317.36         | 6.53                  | 674       | -0.092                                  |
| 19.   | G_max_20G143900 | 76907.96         | 6.77                  | 698       | -0.134                                  |

\* G\_max indicates Glyma., while number indicates the accession number.

Table S3. Cuticular wax composition of both inflorescence stems and leaves of *Arabidopsis* Col-0, *GmLACS2-3 OE1* and *GmLACS2-3 OE2*. Values shown are means  $\pm$  SD ( $\mu\text{g dm}^{-2}$ ), total wax amounts, and coverage of individual compound classes (n = 4). –, Undetectable.

| Sample                      | Total          | Fatty Acids     | Aldehydes       | 1-Alcohols       | 2-Alcohol     | Alkanes        | Ketone       | Esters         |
|-----------------------------|----------------|-----------------|-----------------|------------------|---------------|----------------|--------------|----------------|
| <b>Inflorescence stems</b>  |                |                 |                 |                  |               |                |              |                |
| <b>Col-0</b>                | 1655 $\pm$ 89  | 16.0 $\pm$ 4.3  | 89.7 $\pm$ 12.1 | 127.4 $\pm$ 5.95 | 182 $\pm$ 128 | 701 $\pm$ 27   | 509 $\pm$ 10 | 30.5 $\pm$ 2.2 |
| <b><i>GmLACS2-3 OE1</i></b> | 1711 $\pm$ 136 | 14.3 $\pm$ 2.5  | 95.9 $\pm$ 13.8 | 130.1 $\pm$ 9    | 169 $\pm$ 28  | 727 $\pm$ 45   | 544 $\pm$ 35 | 30.8 $\pm$ 3.4 |
| <b><i>GmLACS2-3 OE2</i></b> | 1801 $\pm$ 127 | 14.7 $\pm$ 1.8  | 98.9 $\pm$ 8.2  | 143.4 $\pm$ 11   | 184 $\pm$ 26  | 767 $\pm$ 48   | 561 $\pm$ 29 | 31.8 $\pm$ 2.9 |
| <b>Rosette leaves</b>       |                |                 |                 |                  |               |                |              |                |
| <b>Col-0</b>                | 41.6 $\pm$ 3.7 | 2.44 $\pm$ 0.56 | 1.62 $\pm$ 0.37 | 6.86 $\pm$ 0.67  | -             | 21.7 $\pm$ 1.7 | -            | -              |
| <b><i>GmLACS2-3 OE1</i></b> | 42.1 $\pm$ 5.0 | 2.61 $\pm$ 0.53 | 2.64 $\pm$ 0.30 | 7.35 $\pm$ 0.89  | -             | 19 $\pm$ 2.1   | -            | -              |
| <b><i>GmLACS2-3 OE2</i></b> | 44.3 $\pm$ 5.4 | 2.89 $\pm$ 0.55 | 2.50 $\pm$ 8.2  | 7.63 $\pm$ 10.2  | -             | 19.9 $\pm$ 1.9 | -            | -              |
